# Supplementary material
Source: Springer Nature journal article supplement (https://www.springermedizin.de/resource/supplementary/12885_2010_2533_MOESM6_ESM.pdf/9462292)

**a.****Before RSV injection**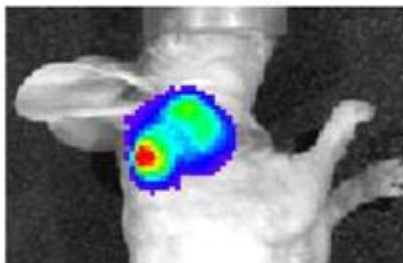**After 4 RSV injections**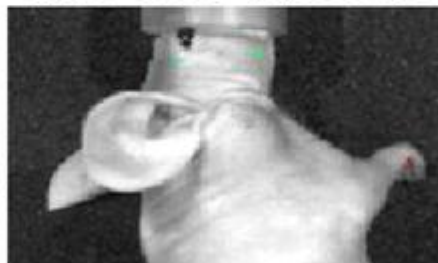**44 days post-RSV injections**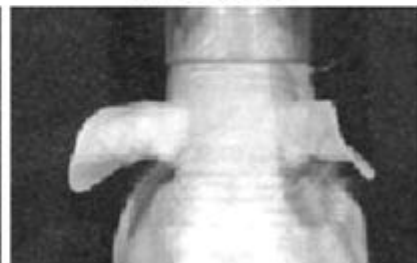**b.**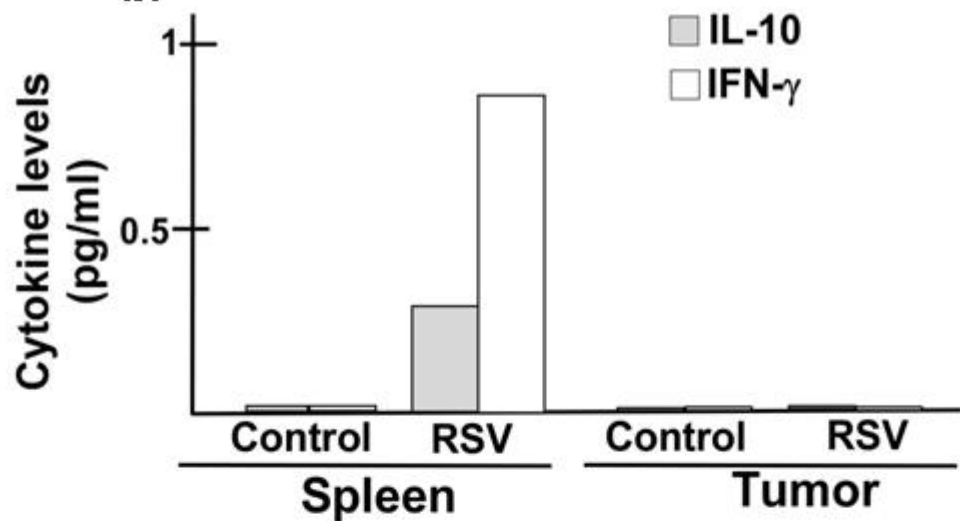

Supplement: MOESM6 [file 9462292]
